# Supplementary material
Source: PubMed Central journal article supplement (PMC548658)
Supplement: 7600553s1.pdf [file 7600553s1.pdf]

SUPPLEMENTARY MATERIAL FOR  
RUDRA et al EMBO 49713

Supplemental Table 1

Affymetrix array data for Figure 8.

There are three sheets.

Sheet 1 is the duplicate data for the wt strain.

Sheet 2 and 3 are duplicate data for the *DFHL1* and *DFHL1/DIFH1* strains, respectively, compared to wt. The raw data for the duplicate wt strains are in Columns C and D. Their average is in Column E. The raw data for the duplicate mutant arrays are in Columns F and G. The ratio between mutant and wt strains is in columns H and I. The average ratio is in column J. The plots in Fig 8 are column J (Y axis) vs Column E (X axis).
